# Supplementary material for: Genomic profiling of extracellular vesicle-derived DNA from bronchoalveolar lavage fluid of patients with lung adenocarcinoma
Source: PubMed Central journal article supplement — Transl Lung Cancer Res. 2021 Jan;10(1):104–16. doi: 10.21037/tlcr-20-888 (PMC7867756; doi:10.21037/tlcr-20-888), 2021-01
Supplement: tlcr-10-01-104-rc.pdf [file tlcr-10-01-104-rc.pdf]

## **Materials Design Analysis Reporting (MDAR) Checklist for Authors**

The MDAR framework establishes a minimum set of requirements in transparent reporting applicable to studies in the life sciences (see Statement of Task: [doi:10.31222/osf.io/9sm4x](https://doi.org/10.31222/osf.io/9sm4x)). The MDAR checklist is a tool for authors, editors and others seeking to adopt the MDAR framework for transparent reporting in manuscripts and other outputs. Please refer to the MDAR Elaboration Document for additional context for the MDAR framework.

**Materials**

|                                                                                                                                                                                                         |                                                        |                                         |
|---------------------------------------------------------------------------------------------------------------------------------------------------------------------------------------------------------|--------------------------------------------------------|-----------------------------------------|
| <b>Antibodies</b>                                                                                                                                                                                       | <b>Yes (indicate where provided:</b>                   | <b>n/a</b>                              |
| For commercial reagents, provide supplier name, catalogue number and RRID, if available.                                                                                                                |                                                        | This study did not use antibodies.      |
| <b>Cell materials</b>                                                                                                                                                                                   | <b>Yes (indicate where provided:</b>                   | <b>n/a</b>                              |
| <b>Cell lines:</b> Provide species information, strain. Provide accession number in repository <b>OR</b> supplier name, catalog number, clone number, <b>OR</b> RRID                                    |                                                        | This study did not use cell lines.      |
| <b>Primary cultures:</b> Provide species, strain, sex of origin, genetic modification status.                                                                                                           |                                                        | This study did not use primary cells.   |
| <b>Experimental animals</b>                                                                                                                                                                             | <b>Yes (indicate where provided:</b>                   | <b>n/a</b>                              |
| <b>Laboratory animals:</b> Provide species, strain, sex, age, genetic modification status. Provide accession number in repository <b>OR</b> supplier name, catalog number, clone number, <b>OR</b> RRID |                                                        | This study did not use any animals.     |
| <b>Animal observed in or captured from the field:</b> Provide species, sex and age where possible                                                                                                       |                                                        | This study did not use any animals.     |
| <b>Model organisms:</b> Provide Accession number in repository (where relevant) <b>OR</b> RRID                                                                                                          |                                                        | This study did not use model organisms. |
| <b>Plants and microbes</b>                                                                                                                                                                              | <b>Yes (indicate where provided:</b>                   | <b>n/a</b>                              |
| <b>Plants:</b> provide species and strain, unique accession number if available, and source (including location for collected wild specimens)                                                           |                                                        | This study did not use plants.          |
| <b>Microbes:</b> provide species and strain, unique accession number if available, and source                                                                                                           |                                                        | This study did not use microbes.        |
| <b>Human research participants</b>                                                                                                                                                                      | <b>Yes (indicate where provided:</b>                   | <b>n/a</b>                              |
| Identify authority granting ethics approval (IRB or equivalent committee(s), provide reference number for approval.                                                                                     | Footnote/ Ethical Statement                            |                                         |
| Provide statement confirming informed consent obtained from study participants.                                                                                                                         | Footnote/ Ethical Statement                            |                                         |
| Report on age and sex for all study participants.                                                                                                                                                       | Results/ Clinicopathologic characteristics of patients |                                         |

**Design**

|                                                                                                                                                                     |                                      |                                                                |
|---------------------------------------------------------------------------------------------------------------------------------------------------------------------|--------------------------------------|----------------------------------------------------------------|
| <b>Study protocol</b>                                                                                                                                               | <b>Yes (indicate where provided:</b> | <b>n/a</b>                                                     |
| For clinical trials, provide the trial registration number <b>OR</b> cite DOI in manuscript.                                                                        |                                      | This study was not a clinical trial.                           |
| <b>Laboratory protocol</b>                                                                                                                                          | <b>Yes (indicate where provided:</b> | <b>n/a</b>                                                     |
| Provide DOI or other citation details if detailed step-by-step protocols are available.                                                                             |                                      | There was no additional method.                                |
| <b>Experimental study design (statistics details)</b>                                                                                                               | <b>Yes (indicate where provided:</b> | <b>n/a</b>                                                     |
| State whether and how the following have been done, <b>or</b> if they were not carried out.                                                                         |                                      |                                                                |
| Sample size determination                                                                                                                                           |                                      | This study was not a clinical trial.                           |
| Randomisation                                                                                                                                                       |                                      | This study was not a clinical trial.                           |
| Blinding                                                                                                                                                            |                                      | This study was not a clinical trial.                           |
| Inclusion/exclusion criteria                                                                                                                                        |                                      | This study was not a clinical trial.                           |
| <b>Sample definition and in-laboratory replication</b>                                                                                                              | <b>Yes (indicate where provided:</b> | <b>n/a</b>                                                     |
| State number of times the experiment was replicated in laboratory                                                                                                   |                                      | This study did not perform technical or biological replicates. |
| Define whether data describe technical or biological replicates                                                                                                     |                                      | This study did not perform technical or biological replicates. |
| <b>Ethics</b>                                                                                                                                                       | <b>Yes (indicate where provided:</b> | <b>n/a</b>                                                     |
| Studies involving human participants: State details of authority granting ethics approval (IRB or equivalent committee(s), provide reference number for approval.   | Footnote/ Ethical Statement          |                                                                |
| Studies involving experimental animals: State details of authority granting ethics approval (IRB or equivalent committee(s), provide reference number for approval. |                                      | This study did not involve experimental animals.               |
| Studies involving specimen and field samples: State if relevant permits obtained, provide details of authority approving study; if none were required, explain why. |                                      | This study did not involve specimen and field samples.         |
| <b>Dual Use Research of Concern (DURC)</b>                                                                                                                          | <b>Yes (indicate where provided:</b> | <b>n/a</b>                                                     |
| If study is subject to dual use research of concern, state the authority granting approval and reference number for the regulatory approval                         |                                      | This study was not subject to dual use research of concern     |

**Analysis**

|                                                                                                                                               |                                             |                                                     |
|-----------------------------------------------------------------------------------------------------------------------------------------------|---------------------------------------------|-----------------------------------------------------|
| <b>Attrition</b>                                                                                                                              | <b>Yes (indicate where provided:</b>        | <b>n/a</b>                                          |
| State if sample or data point from the analysis is excluded, and whether the criteria for exclusion were determined and specified in advance. |                                             | There was no exclusion of data points.              |
| <b>Statistics</b>                                                                                                                             | <b>Yes (indicate where provided:</b>        | <b>n/a</b>                                          |
| Describe statistical tests used and justify choice of tests.                                                                                  | Materials and Methods/ Statistical analysis |                                                     |
| <b>Data Availability</b>                                                                                                                      | <b>Yes (indicate where provided:</b>        | <b>n/a</b>                                          |
| State whether newly created datasets are available, including protocols for access or restriction on access.                                  |                                             | There was no newly created datasets.                |
| If data are publicly available, provide accession number in repository or DOI or URL.                                                         |                                             | There was no newly created datasets.                |
| If publicly available data are reused, provide accession number in repository or DOI or URL, where possible.                                  |                                             | This study did not involve publicly available data. |
| <b>Code Availability</b>                                                                                                                      | <b>Yes (indicate where provided:</b>        | <b>n/a</b>                                          |
| For all newly generated code and software essential for replicating the main findings of the study:                                           |                                             |                                                     |
| State whether the code or software is available.                                                                                              |                                             | There was no newly created code or software.        |
| If code is publicly available, provide accession number in repository, or DOI or URL.                                                         |                                             | There was no newly created code or software.        |

**Reporting**

|                                                                                                                                                                                                                                          |                                                                                               |            |
|------------------------------------------------------------------------------------------------------------------------------------------------------------------------------------------------------------------------------------------|-----------------------------------------------------------------------------------------------|------------|
| <b>Adherence to community standards</b>                                                                                                                                                                                                  | <b>Yes (indicate where provided: section/paragraph)</b>                                       | <b>n/a</b> |
| MDAR framework recommends adoption of discipline-specific guidelines, established and endorsed through community initiatives. Journals have their own policy about requiring specific guidelines and recommendations to complement MDAR. |                                                                                               |            |
| State if relevant guidelines (eg., ICMJE, MIBBI, ARRIVE) have been followed, and whether a checklist (eg., CONSORT, PRISMA, ARRIVE) is provided with the manuscript.                                                                     | ICMJE guidelines were followed, as the journal follows ICMJE recommendations for publication. |            |

Article Information: <http://dx.doi.org/10.21037/tlcr-20-888>
